# Supplementary material
Source: PubMed Central journal article supplement (PMC6488452)
Supplement: NIHMS1511033-supplement-3.pdf [file NIHMS1511033-supplement-3.pdf]

### Supplement 1. Description of the replication sample

The replication sample ( $N=2,503$ ) comprised four studies conducted in diverse geographic regions and clinical settings: (1) referrals to a psychology clinic within a large hospital in Chicago ( $n=1,537$ )<sup>1</sup>, (2) a randomized controlled trial (RCT) for children (ages 6-12) with attention deficit hyperactivity disorder (ADHD) and co-occurring severe aggression recruited from four university-affiliated sites (The Ohio State University, Case Western Reserve University, the University of Pittsburgh, and Stony Brook University), the Treatment of Severe Child Aggression (TOSCA)<sup>2</sup> ( $n=168$ ); (3) youth (ages 6–12) attending outpatient mental health clinics in four university-affiliated sites (Case Western Reserve University, Cincinnati Children's Medical Center, the Ohio State University, and the University of Pittsburgh Medical Center/Western Psychiatric Institute and Clinic) recruited for participation in the Longitudinal Assessment of Manic Symptoms (LAMS) study<sup>3</sup> ( $n=462$ ); and (4) consecutive referrals to a psychological testing service within a pediatric hospital in the Midwest<sup>4,5</sup> ( $n=336$ ).

| Studies          | (1)            | (2)            | (3)            | (4)            | Total          |
|------------------|----------------|----------------|----------------|----------------|----------------|
| <i>N</i>         | 1,537          | 168            | 462            | 336            | 2,503          |
| % Male           | 69.6           | 76.8           | 66.9           | 61.9           | 68.5           |
| Mean age<br>(SD) | 8.83<br>(1.90) | 8.89<br>(2.01) | 9.26<br>(1.86) | 9.88<br>(2.70) | 9.06<br>(2.06) |

## Supplemental Tables

**Table S1. The List of Child And Adolescent Symptom Inventory-4R Autism Spectrum**

### Disorder Items

| Item numbers | Items                                                     |
|--------------|-----------------------------------------------------------|
| 1            | Relates to others in an unusual way                       |
| 2            | Difficulty playing with and relating to other children    |
| 3            | Lack of interest in making friends                        |
| 4            | Lacks interest in or awareness of other people's feelings |
| 5            | Language difficulties                                     |
| 6            | Difficulty engaging in socially appropriate conversation  |
| 7            | Speaks in an odd way                                      |
| 8            | Difficulty engaging in make-believe play                  |
| 9            | Is preoccupied with certain topics                        |
| 10           | Distressed by small changes in routine or environment     |
| 11           | Engages in odd repetitive movements                       |
| 12           | Has intense interest in parts of objects                  |

**Note:** Specific item content is abridged to comply with limitations on publication of copyrighted measures.

**Table S2. Factor Loadings for the Three-Factor Exploratory Factor Analysis**

| Items                                               | Factors loadings |        |        |
|-----------------------------------------------------|------------------|--------|--------|
|                                                     | SI               | COM    | RRB    |
| Peculiar way of relating to others                  | .708*            | .017   | .119   |
| Does not play well with others                      | .952*            | -.055  | .016   |
| Not interested in making friends                    | .869*            | .030   | -.093  |
| Unaware of other people's feelings                  | .803*            | -.080  | -.001  |
| Significant problem with language                   | .007             | 1.136* | -.312* |
| Difficulty making socially appropriate conversation | .406*            | .548*  | .003   |
| Talks in a strange way                              | -.063            | .761*  | .204*  |
| Unable to pretend when playing                      | .180*            | .511*  | .188*  |
| Excessive preoccupation with one topic              | .173*            | -.001  | .678*  |
| Upset over small changes in routine                 | .196*            | .000   | .506*  |
| Makes strange repetitive movements                  | .084             | .161   | .577*  |
| Strange fascination for parts of objects            | -.001            | .163   | .706*  |

*Note.* Exploratory factor analysis was conducted with robust maximum likelihood estimation and oblique Geomin rotation. COM = communication; RRB = restricted repetitive behavior; SI = social interaction;

\*Significant at  $p < .05$ .

**Table S3a. Model Fit Information for the Top Five Models From the Original and Replication Analyses**

| Model                     | <i>k</i> | <i>LL</i>  | AIC       | BIC       | Description          |
|---------------------------|----------|------------|-----------|-----------|----------------------|
| Original analysis         |          |            |           |           |                      |
| 3-Factor CFA <sup>a</sup> | 28       | -16884.960 | 33825.919 | 33999.954 | Best-fitting overall |
| 3-Factor EFA              | 45       | -16825.551 | 33741.103 | 34020.803 |                      |
| 4-Factor EFA              | 54       | -16798.631 | 33705.262 | 34040.902 |                      |
| 3-Factor CFA <sup>b</sup> | 27       | -16916.496 | 33886.991 | 34054.811 |                      |
| 5-Factor EFA              | 62       | -16782.744 | 33689.488 | 34074.852 |                      |
| Replication analysis      |          |            |           |           |                      |
| 3-Factor EFA              | 45       | -10001.098 | 20092.196 | 20354.332 | Best-fitting overall |
| 4-Factor EFA              | 54       | -9982.584  | 20073.169 | 20387.732 |                      |
| 3-Factor CFA <sup>a</sup> | 28       | -10085.544 | 20227.088 | 20390.195 |                      |
| 5-Factor EFA              | 62       | -9964.762  | 20053.524 | 20414.689 |                      |
| 3-Factor CFA <sup>b</sup> | 27       | -10122.402 | 20298.804 | 20456.085 |                      |

Note. AIC = Akaike information criteria; BIC = Bayesian information criteria; CFA = confirmatory factor analysis; EFA = exploratory factor analysis; *k* = number of parameters; *LL* = log-likelihood.

Model subscripts:

<sup>a</sup>CFA with cross-loading of item “difficulty engaging in socially appropriate conversation”

<sup>b</sup>CFA with no cross-loading

**Table S3b. The Best-Fitting Models of Each Approach From the Original and Replication****Analyses**

| Approach          | Original analysis     |          |           |          |          | Replication analysis  |          |           |          |          |
|-------------------|-----------------------|----------|-----------|----------|----------|-----------------------|----------|-----------|----------|----------|
|                   | Model                 | <i>k</i> | <i>LL</i> | AIC      | BIC      | Model                 | <i>k</i> | <i>LL</i> | AIC      | BIC      |
| Best-fitting EFA  | 3-factor              | 45       | -16825.55 | 33741.10 | 34020.80 | 3-factor              | 45       | -10001.10 | 20092.20 | 20354.33 |
| Best-fitting CFA  | 3-factor <sub>1</sub> | 28       | -16884.96 | 33825.92 | 33999.95 | 3-factor <sub>1</sub> | 28       | -10085.54 | 20227.09 | 20390.20 |
| Best-fitting LCA  | 6-class               | 77       | -16841.50 | 33837.01 | 34315.60 | 5-class               | 64       | -10045.99 | 20219.98 | 20592.80 |
| Best-fitting EFMA | 2-factor              | 71       | -16754.96 | 33651.93 | 34093.23 | 2-factor              | 71       | -9956.80  | 20055.60 | 20469.19 |
|                   | /2-class              |          |           |          |          | /2-class              |          |           |          |          |
| Best-fitting LCFA | 3-factor              | 45       | -16914.32 | 33918.64 | 34198.34 | 3-factor              | 45       | -10105.78 | 20301.56 | 20563.69 |
|                   | /6-class              |          |           |          |          | /6-class              |          |           |          |          |

Note: AIC = Akaike information criteria; BIC = Bayesian information criteria; CFA = confirmatory factor analysis; EFA = exploratory factor analysis; EFMA = exploratory factor mixture analysis; *k* = number of parameters; LCA = latent class analysis; LCFA = latent class factor analysis; *LL* = log-likelihood.

Model subscripts:

<sup>a</sup>3-factor CFA with cross-loading of item “difficulty engaging in socially appropriate conversation

**Supplemental Figures**

Animated 3-dimensional interactive figures of the distribution of autism spectrum disorder symptoms. For download: <http://psychology.psy.sunysb.edu/asd/>

**Figure S1.** For the Distribution of Symptoms of the Total Sample.

[http://psychology.psy.sunysb.edu/asd/ASD\\_Smooth\\_All\\_colored\\_total\\_symptoms\\_CFA.html](http://psychology.psy.sunysb.edu/asd/ASD_Smooth_All_colored_total_symptoms_CFA.html)

**Figure S2.** For the Distribution of Symptoms of Individuals Whose Autism Spectrum Disorder Diagnostic Status was Known:

[http://psychology.psy.sunysb.edu/asd/Smooth\\_ASD\\_Diag\\_new%20smoothing.html](http://psychology.psy.sunysb.edu/asd/Smooth_ASD_Diag_new%20smoothing.html)

*Note.* These figures can be zoomed in/out and oriented by the viewer using their mouse.

## Supplemental References

1. Lavigne JV, Cromley T, Sprafkin J, Gadow KD. The Child and Adolescent Symptom Inventory-Progress Monitor: a brief Diagnostic and Statistical Manual of Mental Disorders, -referenced parent-report scale for children and adolescents. *Journal of child and adolescent psychopharmacology*. 2009;19(3):241-252.
2. Gadow KD, Arnold LE, Molina BS, et al. Risperidone added to parent training and stimulant medication: effects on attention-deficit/hyperactivity disorder, oppositional defiant disorder, conduct disorder, and peer aggression. *Journal of the American Academy of Child & Adolescent Psychiatry*. 2014;53(9):948-959. e941.
3. Findling RL, Youngstrom EA, Fristad MA, et al. Characteristics of children with elevated symptoms of mania: the Longitudinal Assessment of Manic Symptoms (LAMS) study. *The Journal of clinical psychiatry*. 2010;71(12):1664.
4. Castellanos I, Kronenberger WG, Pisoni DB. Questionnaire-based assessment of executive functioning: Psychometrics. *Applied Neuropsychology: Child*. 2018;7(2):93-109.
5. Levy JD, Kronenberger WG, Dunn DW. Development of a very brief measure of ADHD: The CHAOS scale. *Journal of attention disorders*. 2017;21(7):575-586.
